# Supplementary material
Source: publisher figshare collection journal article supplement (https://tandf.figshare.com/ndownloader/files/12891605)
Supplement: Supplementary file 1 [file 12891605]

Leila Nunes Morgado, Danielle Dantas Lima, Claudia Barbieri Ferreira Mendonça & Vania Gonçalves-Esteves (2018) Pollen spectrum in propolis of Tetragonisca angustula Latreille (Apidae: Trigonini) in an island area, Brazil. Bee World 95.

**Table S1.** Pollen taxa found in propolis by *Tetragonisca angustula* (Apidae: Trigonini) in an Atlantic Rainforest area of Ilha Grande, Rio de Janeiro, Brazil. fa = absolute frequency, % = relative frequency

| Taxa | October 2006 | | November 2006 | | December 2006 | | February 2007 | | March 2007 | | April 2007 | | May 2007 | | June 2007 | | July 2007 | | August 2007 | | September 2007 | | October 2007 | |
| --- | --- | --- | --- | --- | --- | --- | --- | --- | --- | --- | --- | --- | --- | --- | --- | --- | --- | --- | --- | --- | --- | --- | --- | --- |
|  | fa | % | fa | *%* | fa | *%* | fa | *%* | fa | *%* | fa | *%* | fa | *%* | fa | *%* | fa | *%* | fa | *%* | fa | *%* | fa | *%* |
| Acanthaceae / *Dyschoriste* | - | - | - | - | - | - | - | - | - | - | - | - | 2 | 0.07 | - | - | 5 | 0.22 | - | - | - | - | - | - |
| Acanthaceae / *Justicia* | - | - | - | - | - | - | - | - | - | - | - | - | - | - | - | - | - | - | - | - | 2 | 0.1 | - | - |
| Amaranthaceae / Type 1 | - | - | - | - | - | - | - | - | - | - | - | - | - | - | 2 | 0.09 | - | - | - | - | - | - | - | - |
| Amaranthaceae*/ Alternanthera* | - | - | 3 | 0.1 | - | - | - | - | - | - | - | - | - | - | - | - | - | - | - | - | - | - | - | - |
| Amaranthaceae*/ Blutaparon* | - | - | - | - | - | - | 5 | 0.2 | - | - | 1 | 0.05 | - | - | - | - | 5 | 0.22 | - | - | 16 | 0.8 | 15 | 0.75 |
| Amaryllidaceae / *Hymenocallis* | 5 | 0.09 | - | - | - | - | 1 | 0.04 | - | - | 1 | 0.05 | - | - | 1 | 0.05 | - | - | - | - | - | - | - | - |
| Anacardiaceae / *Anacardium* | 17 | 0.3 | 72 | 1.3 | 108 | 2.66 | 90 | 3.61 | 20 | 0.83 | 50 | 2.42 | 62 | 2.2 | 19 | 0.88 | 79 | 3.51 | 6 | 0.4 | - | - | 11 | 0.55 |
| Anacardiaceae*/ Astronium* | 4 | 0.07 | - | - | - | - | 24 | 0.96 | - | - | - | - | - | - | - | - | - | - | - | - | 4 | 0.2 | - | - |
| Anacardiaceae/*Schinus terebenthifolius* | 64 | 1.12 | 38 | 0.7 | 26 | 0.64 | 50 | 2.01 | 11 | 0.46 | 25 | 1.21 | 45 | 1.59 | 45 | 2.09 | 14 | 0.62 | - | - | 12 | 0.6 | 40 | 2 |
| Anacardiaceae / *Spondias* | 48 | 0.84 | 40 | 0.7 | 24 | 0.59 | 60 | 2.41 | 58 | 2.41 | 60 | 2.91 | - | - | 51 | 3.36 | 21 | 0.93 | 31 | 1.9 | - | - | 52 | 2.6 |
| Anacardiaceae / *Tapirira** | 228 | 3.99 | 342 | 6.3 | 128 | 3.16 | 89 | 3.57 | 143 | 5.94 | 93 | 4.51 | 78 | 2.76 | 63 | 2.92 | 129 | 5.74 | 110 | 6.7 | 93 | 4.66 | 110 | 5.51 |
| Apiaceae*/ Petroselinum* | - | - | - | - |  | - | - | - | - | - | 3 | 0.15 | 3 | 0.11 | - | - | - | - | 6 | 0.4 | - | - | - | - |
| Apiaceae / *Polytaenia* | 30 | 0.52 | 20 | 0.4 | - | - | - | - | - | - | - | - | - | - | - | - | 20 | 0.89 | - | - | - | - | - | - |
| Apocynaceae / Type 1 | 20 | 0.35 | 16 | 0.3 | 35 | 0.86 | 16 | 0.64 | 25 | 1.04 | 16 | 0.77 | - | - | 12 | 0.56 | 21 | 0.93 | 13 | 0.8 | 35 | 1.75 | 11 | 0.55 |
| Apocynaceae*/ Aspidosperma* | 6 | 0.1 | - | - |  | - | 3 | 0.12 | - | - | - | - | - | - | - | - | - | - | - | - | - | - | - | - |
| Aquifoliaceae / *Ilex* | 16 | 0.28 | 25 | 0.5 | 2 | 0.05 | - | - | 13 | 0.54 | - | - | 14 | 0.5 | 3 | 0.14 | - | - | - | - | - | - | - | - |
| Araceae / *Philodendron* | - | - | - | - | - | - | - | - | - | - | - | - | - | - | - | - | 8 | 0.36 | - | - | 5 | 0.25 | - | - |
| Araliaceae / *Dendropanax* | 9 | 0.16 | 38 | 0.7 | - | - | 13 | 0.52 | - | - | - | - | 44 | 1.56 | 23 | 1.07 | - | - | - | - | - | - | 14 | 0.7 |
| Arecaceae / Type 1 | - | - | - | - | - | - | - | - | - | - | - | - | - | - | 10 | 0.46 | - | - | - | - | - | - | - | - |
| Arecaceae / *Astrocaryum* | - | - | - | - | 5 | 0.12 | - | - | - | - | - | - | - | - | - | - | 21 | 0.93 | - | - | - | - | - | - |
| Arecaceae / *Syagrus* | 800 | 14 | 486 | 8.9 | 270 | 6.66 | 120 | 4.82 | 121 | 5.03 | 144 | 6.98 | 148 | 5.24 | 103 | 4.78 | 157 | 6.99 | 100 | 6 | 150 | 7.51 | 142 | 7.11 |
| Asteraceae / *Albertinia* | 3 | 0.05 | - | - | - | - | - | - | - | - | - | - | 21 | 0.74 | - | - | - | - | - | - | - | - | - | - |
| Asteraceae / *Ambrosia* | - | - | - | - | - | - | 6 | 0.24 | - | - | - | - | - | - | - | - | - | - | - | - | - | - | - | - |
| Asteraceae / *Bidens* | 42 | 0.73 | - | - | - | - | - | - | 2 | 0.08 | - | - | 22 | 0.78 | - | - | 21 | 0.93 | - | - | - | - | 19 | 0.95 |
| Asteracea/*Baccharis dracunculifolia* | 13 | 0.23 | 42 | 0.8 | 10 | 0.25 | 20 | 0.8 | 20 | 0.83 | 22 | 1.06 | - | - | 49 | 2.27 | 7 | 0.31 | 39 | 2.4 | - | - | 42 | 2.1 |
| Asteraceae / *Chromolaena* | 20 | 0.35 | - | - | - | - | 2 | 0.08 | 29 | 1.2 | - | - | 15 | 0.53 | 15 | 0.69 | 21 | 0.93 | - | - | 15 | 0.75 | - | - |
| Asteraceae / *Eclipta* | 5 | 0.09 | - | - | 20 | 0.49 | 10 | 0.4 | - | - | - | - | 16 | 0.57 | - | - | - | - | - | - | - | - | - | - |
| Asteraceae /*Praxelis* | 39 | 0.68 | 43 | 0.8 | 81 | 2 | 2 | 0.08 | 37 | 1.54 | - | - | - | - | 43 | 1.99 | - | - | 22 | 1.3 | 13 | 0.65 | 30 | 1.5 |
| Asteraceae / *Mikania* | 53 | 0.93 | 45 | 0.8 | 25 | 0.62 | 63 | 2.53 | 50 | 2.08 | 10 | 0.48 | - | - | 35 | 1.62 | 39 | 1.73 | - | - | 14 | 0.7 | - | - |
| Asteraceae/ *Lepidaploa* | 4 | 0.07 | 30 | 0.6 | 7 | 0.17 | - | - | 1 | 0.04 | 14 | 0.68 | 5 | 0.18 | 80 | 3.71 | - | - | 66 | 4 | 54 | 2.7 | 72 | 3.61 |
| Asteraceae/ *Vernonanthura* | 49 | 0.86 | 51 | 0.9 | 158 | 3.9 | 68 | 2.73 | 54 | 2.24 | 63 | 3.05 | 76 | 2.29 | 26 | 1.2 | 46 | 2.05 | 35 | 2.1 | 91 | 4.56 | 93 | 4.66 |
| Asteraceae / *Wedelia* | 6 | 0.1 | - | - | 22 | 0.54 | 17 | 0.68 | - | - | - | - | 26 | 0.92 | - | - | - | - | 5 | 0,3 | 7 | 0.35 | - | - |
| Begoniaceae / *Begonia* | 40 | 0.7 | 56 | 1 | 57 | 1.4 | 17 | 0.68 | - | - | - | - | - | - | - | - | 22 | 0.98 | 5 | 0.3 | 12 | 0.6 | - | - |
| Bignoniaceae / Type 1 | 6 | 0.1 | 9 | 0.2 | 30 | 0.74 | 16 | 0.64 | 7 | 0.29 | - | - | 25 | 0.88 | 2 | 0.09 | - | - | 17 | 1 | 10 | 0.5 | - | - |
| Bignoniaceae / Type 2 | - | - | 6 | 0.1 | - | - | - | - | - | - | 4 | 0.19 | - | - | 22 | 1.02 | 14 | 0.62 | - | - | - | - | - | - |
| Bignoniaceae*/ Anemopaegma* | 4 | 0.07 | - | - | - | - | - | - | - | - | - | - | - | - | - | - | - | - | - | - | - | - | - | - |
| Bignoniaceae / *Fridericia* | 8 | 0.14 | - | - | 2 | 0.05 | 25 | 1 | - | - | 19 | 0.92 | 12 | 0.42 | 2 | 0.09 | 14 | 0.62 | 13 | 0.8 | - | - | 5 | 0.25 |
| Bignoniaceae / *callichlamys* | - | - | - | - | - | - | - | - | - | - | - | - | - | - | - | - | - | - | - | - | - | - | 10 | 0.5 |
| Bignoniaceae / *Spathodea* | 1 | 0.02 | - | - | - | - | - | - | - | - | - | - | - | - | - | - | 32 | 1.42 | - | - | - | - | - | - |
| Bignoniaceae / *Stizophyllum* | 18 | 0.31 | 3 | 0.1 | - | - | 18 | 0.72 | 12 | 0.5 | - | - | 2 | 0.07 | 10 | 0.46 | 12 | 0.53 | 10 | 0.6 | - | - | - | - |
| Bromeliaceae / *Billbergia* | 1 | 0.02 | 5 | 0.1 | - | - | - | - | - | - | - | - | - | - | - | - | - | - | - | - | - | - | 20 | 1 |
| Bromeliaceae / *Catopsis* | - | - | - | - | - | - | - | - | - | - | - | - | - | - | 2 | 0.09 | 5 | 0.22 | - | - | - | - | 1 | 0.05 |
| Cannabaceae*/ Trema*** | 193 | 3.38 | 325 | 6 | 240 | 5.92 | 111 | 4.46 | 41 | 1.7 | 73 | 3.54 | 92 | 3.26 | 44 | 2.04 | 71 | 3.16 | 73 | 4.4 | 155 | 7.76 | 20 | 1 |
| Caricaceae / *Carica* | - | - | 11 | 0.2 | - | - | 2 | 0.08 | - | - | - | - | - | - | - | - | - | - | - | - | - | - | - | - |
| Caryocaraceae / *Caryocar* | 1 | 0,02 | 1 | 0 | - | - | - | - | - | - | - | - | - | - | - | - | - | - | - | - | - | - | - | - |
| Casuarinaceae / *Casuarina* | 4 | 0.07 | 7 | 0.1 | 166 | 4.09 | 20 | 0.8 | 43 | 1.79 | 38 | 1.84 | 90 | 3.19 | 29 | 1.34 | 42 | 1.87 | 24 | 1.5 | 46 | 2.3 | 55 | 2.75 |
| Celastraceae*/ Hippocrateavolubilis* | - | - | - | - | - | - | - | - | - | - | - | - | - | - | - | - | - | - | 2 | 0.1 | - | - | - | - |
| Celastraceae / Type 1 | - | - | 2 | 0 | - | - | - | - | - | - | - | - | 1 | 0.03 | - | - | - | - | - | - | - | - | - | - |
| Clethraceae / *Clethra* | 27 | 0.47 | - | - | - | - | - | - | - | - | 5 | 0.24 | 7 | 0.25 | - | - | - | - | 17 | 1 | - | - | - | - |
| Combretaceae / Type 1 | - | - | - | - | - | - | - | - | - | - | - | - | 11 | 0.39 | - | - | - | - | - | - | 5 | 0.25 | - | - |
| Commelinaceae / *Commelina* | 1 | 0.02 | - | - | - | - | - | - | - | - | - | - | 2 | 0.07 | - | - | - | - | 7 | 0.4 | - | - | - | - |
| Convolvulaceae / *Merremia* | - | - | - | - | - | - | 3 | 0.12 | - | - | - | - | - | - | - | - | - | - | 3 | 0.2 | - | - | - | - |
| Cucurbitaceae / *Cayaponia* | 5 | 0.09 | - | - | 2 | 0.05 | - | - | - | - | - | - | - | - | - | - | - | - | 2 | 0.1 | - | - | - | - |
| Dilleniaceae / *Doliocarpus* | 14 | 0.24 | - | - | - | - | - | - | - | - | 2 | 0.1 | - | - | - | - | - | - | - | - | - | - | - | - |
| Erythroxylaceae / *Erythroxylum* | 27 | 0.47 | 23 | 0.4 | 6 | 0.15 | 41 | 1.64 | 5 | 0.21 | 5 | 0.24 | 13 | 0.46 | 28 | 1.3 | 14 | 0.62 | 5 | 0.3 | 5 | 0.25 | - | - |
| Euphorbiaceae / Type 1 | 4 | 0.07 | - | - | - | - | - | - | - | - | - | - | - | - | - | - | - | - | - | - | - | - | - | - |
| Euphorbiaceae / Type 2 | - | - | - | - | 15 | 0.37 | - | - | - | - | - | - | - | - | - | - | - | - | - | - | - | - | - | - |
| Euphorbiaceae / *Alchornea* | 169 | 2.69 | 185 | 3.4 | 147 | 3.62 | 30 | 1.2 | 11 | 0.46 | 18 | 0.87 | 83 | 2.94 | 37 | 1.72 | 16 | 0.71 | 10 | 0.6 | - | - | - | - |
| Euphorbiaceae / *Aparisthmium* | - | - | 10 | 0.2 | 16 | 0.39 | - | - | 65 | 2.7 | 8 | 0.39 | - | - | - | - | - | - | - | - | - | - | - | - |
| Euphorbiaceae / *Dalechampia***** | 721 | 12,6 | 594 | 11 | 449 | 11.1 | 154 | 6.18 | 228 | 9.48 | 144 | 6.98 | 188 | 6.66 | 154 | 7.14 | 176 | 7.83 | 182 | 11 | 190 | 9.52 | 210 | 10.5 |
| Euphorbiaceae / *Sapium* | 32 | 0.56 | 69 | 1.3 | 6 | 0.15 | 10 | 0.4 | 30 | 1.25 | 14 | 0.68 | 20 | 0.71 | 20 | 0.93 | 21 | 0.93 | - | - | - | - | 6 | 0.3 |
| Euphorbiaceae / *Sebastiania* | 16 | 0.28 | 151 | 2.8 | 32 | 0.79 | 29 | 1.16 | 21 | 0.87 | 15 | 0.73 | 15 | 0.53 | 30 | 1.39 | 11 | 0.49 | - | - | 42 | 2.1 | 14 | 0.7 |
| Fabaceae / Type 1 | - | - | - | - | - | - | - | - | 1 | 0.04 | - | - | 12 | 0.42 | - | - | - | - | - | - | - | - | - | - |
| Fabaceae / *Anadenanthera* | 245 | 4.29 | 192 | 3.6 | 235 | 5.79 | 35 | 1.4 | 40 | 1.66 | 111 | 5.38 | 50 | 1.77 | 47 | 2.18 | 34 | 1.51 | 30 | 1.8 | - | - | 65 | 3.26 |
| Fabaceae / *Andira* | 74 | 1.29 | 62 | 1.1 | 10 | 0.25 | 16 | 0.64 | - | - | - | - | - | - | 10 | 0.46 | - | - | 14 | 0.9 | 7 | 0.35 | - | - |
| Fabaceae / *Caesalpinia* | 1 | 0.02 | 5 | 0.1 | - | - | 4 | 0.16 | 3 | 0.12 | 6 | 0.29 | 16 | 0.57 | 11 | 0.51 | 6 | 0.27 | 15 | 0.9 | 21 | 1.05 | 1 | 0.05 |
| Fabaceae / *Cajanus* | 25 | 0.44 | 14 | 0.3 | 122 | 3.07 | 43 | 1.73 | 13 | 0.54 | 20 | 0.97 | 52 | 1.84 | 22 | 1.02 | 70 | 3.11 | 28 | 1.7 | 11 | 0.55 | - | - |
| Fabaceae / *Chamaecrista* | - | - | - | - | 12 | 0.29 | - | - | - | - | - | - | - | - | - | - | - | - | - | - | - | - | - | - |
| Fabaceae / *Desmodium* | 82 | 1.43 | 61 | 1.1 | 11 | 0.27 | 34 | 1.36 | 40 | 1.7 | 6 | 0.29 | 40 | 1.42 | 48 | 2.23 | 15 | 0.67 | 19 | 1.2 | - | - | - | - |
| Fabaceae*/ Inga* | 394 | 6.89 | 205 | 3.8 | 145 | 3.57 | 160 | 6.42 | 145 | 6.03 | 104 | 5.04 | 104 | 3.68 | 105 | 4.87 | 78 | 3.47 | 48 | 2.9 | 110 | 5.51 | 65 | 3.26 |
| Fabaceae / *Leucaena* | - | - | 4 | 0.1 | - | - | 13 | 0.52 | 4 | 0.17 | 16 | 0.77 | - | - | - | - | - | - | - | - | 6 | 0.3 | 34 | 1.7 |
| Fabaceae / *Mimosa* | 36 | 0.63 | 28 | 0.5 | 31 | 0.76 | 5 | 0.2 | 22 | 0.91 | 20 | 0.97 | 7 | 0.25 | - | - | 41 | 1.82 | - | - | - | - | 5 | 0.25 |
| Fabaceae / *Mimosa casta* | 9 | 0.16 | - | - | - | - | - | - | - | - | - | - | 1 | 0.03 | - | - | - | - | - | - | 11 | 0.55 | - | - |
| Fabaceae / *Mimosa pudica* | - | - | 6 | 0.1 | - | - | - | - | - | - | - | - | - | - | - | - | - | - | - | - | - | - | - | - |
| Fabaceae / *Piptadenia* | 448 | 7.84 | 322 | 5.9 | 106 | 2.61 | 130 | 5.22 | 169 | 7.02 | 48 | 2.32 | 172 | 6.1 | 99 | 4.59 | 64 | 2.85 | 85 | 5.1 | 51 | 2.55 | 35 | 1.75 |
| Indeterminado | 3 | 0,05 | 42 | 0,8 | 11 | 0,27 | - | - | 3 | 0.12 | 10 | 0.48 | - | - | 31 | 1.44 | - | - | - | - | - | - | 1 | 0.05 |
| Lamiaceae / *Hyptis* | - | - | 2 | - | - | - | - | - | - | - | 7 | 0.34 | - | - | - | - | 4 | 0.18 | - | - | - | - | 15 | 0.75 |
| Lamiaceae*/ Ocimum* | - | - | - | - | 2 | 0.05 | 5 | 0.2 | 1 | 0.04 | 1 | 0.05 | - | - | 2 | 0.09 | 21 | 0.93 | - | - | - | - | - | - |
| Loranthaceae / *Struthanthus* | 8 | 0.14 | 1 | - | - | - | - | - | - | - | - | - | - | - | - | - | - | - | 10 | 0.6 | - | - | - | - |
| Lythraceae*/ Cuphea* | - | - | - | - | - | - | 1 | 0.04 | - | - | 3 | 0.15 | - | - | - | - | - | - | - | - | - | - | - | - |
| Malpighiaceae / Type 1 | 1 | 0.02 | - | - | - | - | - | - | - | - | - | - | - | - | - | - | - | - | 15 | 0.9 | - | - | 20 | 1 |
| Malpighiaceae / *Banisteriopsis* | 45 | 0.79 | 117 | 2.2 | 65 | 1.6 | 4 | 0.16 | 76 | 3.16 | 7 | 0.34 | 55 | 1.95 | 18 | 0.83 | 50 | 2.22 | 11 | 0.7 | 5 | 0.25 | - | - |
| Malpighiaceae / *Heteropterys* | 2 | 0,03 | 5 | 0.1 | 28 | 0.69 | 54 | 2.17 | 75 | 3.12 | 19 | 0.92 | 80 | 2.83 | 60 | 2.78 | - | - | 16 | 1 | 17 | 0,85 | 30 | 1.5 |
| Malpighiaceae / *Stigmaphyllon* | 6 | 0.1 | 2 | 0 | - | - | 27 | 1.08 | 6 | 0.25 | 27 | 1,31 | 51 | 1.81 | - | - | 30 | 1,33 | 37 | 2,2 | 17 | 0,85 | 50 | 2.5 |
| Malpighiaceae / *Tetrapterys**** | 275 | 4.81 | 36 | 0.7 | 160 | 3.95 | 60 | 2.4 | 71 | 2.95 | 75 | 3.63 | 73 | 2.59 | 65 | 3.01 | 49 | 2.18 | 20 | 1.2 | 81 | 4.06 | 60 | 3.01 |
| Malvaceae / *Bombacopsis* | - | - | 5 | 0.1 | - | - | - | - | 6 | 0.25 | - | - | 3 | 0.11 | - | - | - | - | - | - | - | - | - | - |
| Malvaceae / *Ceiba* | 6 | 0.1 | 3 | 0.1 | - | - | 7 | 0.28 | - | - | - | - | 15 | 0.53 | - | - | - | - | - | - | 17 | 0.85 | - | - |
| Malvaceae / *Hibiscus* | - | - | - | - | 1 | 0.02 | - | - | 6 | 0.25 | 1 | 0.05 | 10 | 0.35 | - | - | 11 | 0.49 | - | - | 21 | 1.05 | - | - |
| Malvaceae / *Melochia* | 2 | 0.03 | - | - | - | - | - | - | - | - | 12 | 0,58 | 17 | 0.6 | - | - | - | - | - | - | - | - | 30 | 1.5 |
| Malvaceae / *Pachira* | - | - | 3 | 0.1 | 21 | 0.52 | 2 | 0.08 | - | - | - | - | 1 | 0.03 | 7 | 0,32 | 7 | 0.31 | 5 | 0.3 | - | - | - | - |
| Malvaceae / *Pavonia* | - | - | - | - | - | - | 5 | 0.2 | 2 | 0.08 | - | - | - | - | 4 | 0.18 | - | - | 5 | 0.3 | 2 | 0.1 | - | - |
| Malvaceae / *Sida* | 4 | 0.07 | - | - | 6 | 0.15 | 1 | 0.04 | 1 | 0.04 | - | - | - | - | - | - | - | - | - | - | - | - | 2 | 0,1 |
| Martyniaceae*/ Ibicella* | 11 | 0.19 | 6 | 0.1 | 30 | 0.74 | 71 | 2.85 | 56 | 2.33 | 58 | 2.81 | 53 | 1.9 | 41 | 1.9 | 43 | 1.91 | 12 | 0.7 | 11 | 0.55 | 20 | 1 |
| Melastomataceae / *Miconia* | 92 | 1.61 | 43 | 0.8 | 65 | 1.6 | 75 | 3.01 | 54 | 2.24 | 47 | 2.28 | 81 | 2.87 | 58 | 2.69 | 54 | 2.4 | 10 | 0.6 | 16 | 0.8 | 19 | 0.95 |
| Melastomataceae / *Tibouchina* | 32 | 0.56 | 55 | 1 | 46 | 1.13 | - | - | - | - | 24 | 1.16 | 21 | 0.74 | - | - | 12 | 0.53 | 5 | 0.3 | 32 | 1.6 | 32 | 1.6 |
| Melastomataceae / *Clidemia* | 6 | 0.1 | 1 | 0 | - | - | 10 | 0,4 | - | - | - | - | - | - | - | - | - | - | - | - | - | - | - | - |
| Meliaceae / *Trichilia* | 23 | 0.4 | 202 | 3.7 | 30 | 0.74 | 44 | 1.77 | 82 | 3.41 | 81 | 3.92 | 51 | 1.81 | 51 | 2.36 | 59 | 2.62 | 58 | 3.5 | 85 | 4.46 | - | - |
| Menispermaceae / *Cissampelos* | - | - | - | - | - | - | - | - | - | - | - | - | 2 | 0.07 | 11 | 0.51 | - | - | 5 | 0,3 | 16 | 0.8 | - | - |
| Moraceae / *Brosimum* | 172 | 3.01 | 90 | 1.7 | 50 | 1.23 |  |  |  |  | 37 | 1.79 | 38 | 1.35 | 17 | 0.81 | 15 | 0.67 | - | - | 13 | 0.65 | 10 | 0.5 |
| Moraceae / *Ficus* | 124 | 2.17 | 66 | 1.2 | 11 | 0.27 | 35 | 1.4 | 38 | 1.58 | - | - | 8 | 0.28 | 9 | 0.42 | 15 | 0.67 | 25 | 1.5 | - | - | 26 | 1.3 |
| Moraceae / *Helicostylis* | 81 | 1.42 | 129 | 2.4 | 132 | 3.25 | 78 | 3.13 | - | - | 27 | 1.31 | 41 | 1.42 | 37 | 1.72 | 38 | 1.69 | 16 | 1 | 16 | 0.8 | - | - |
| Myrsinaceae / *Rapanea* | - | - | 2 | - | - | - | 7 | 0.28 | - | - | - | - | - | - | - | - | - | - | 5 | 0,3 | - | - | - | - |
| Myrtaceae / *Eucalyptus* | 38 | 0.66 | 87 | 1.6 | 15 | 0.37 | 21 | 0.84 | 14 | 0.58 | 26 | 1.26 | 36 | 1.27 | 25 | 1.16 | - | - | 18 | 1.1 | 52 | 2.6 | 19 | 0.95 |
| Myrtaceae / *Eugenia* | - | - | 5 | 0.1 | - | - | - | - | 7 | 0.29 | 16 | 0.77 | 13 | 0.46 | - | - | 11 | 0.49 | - | - | 17 | 0.85 | - | - |
| Myrtaceae / *Myrcia* | 11 | 0.19 | - | - | - | - | 11 | 0,44 | 20 | 0.83 | 15 | 0.73 | - | - | 19 | 0.88 | 25 | 1.11 | - | - | 10 | 0.5 | - | - |
| Myrtaceae*/ Psidium* | 20 | 0.35 | 64 | 1.2 | 61 | 1.5 | 21 | 0.84 | 30 | 1.25 | 52 | 2.52 | 40 | 1.42 | 37 | 1.72 | 40 | 1.78 | 19 | 1.2 | 20 | 1 | 40 | 2 |
| Plantaginaceae / *Stemodia* | 83 | 1.45 | 200 | 3.7 | 71 | 1.75 | 70 | 2.81 | 58 | 2.41 | 69 | 3.34 | 60 | 2.13 | 61 | 2.83 | 55 | 2.45 | 88 | 5.3 | 76 | 3.81 | 112 | 5.61 |
| Poaceae / Type 1 | 84 | 1.47 | - | - | 16 | 0.39 | - | - | 1 | 0.04 | 15 | 0.73 | 17 | 0.6 | - | - | - | - | 32 | 1.9 | - | - | - | - |
| Poaceae*/ Paspalum* | 3 | 0.05 | - | - | - | - | 5 | 0.2 | 5 | 0.21 | - | - | - | - | - | - | - | - | 3 | 0.2 | - | - | - | - |
| Polygalaceae / *Polygala* | - | - | - | - | - | - | - | - | 3 | 0.12 | - | - | 6 | 0.21 | - | - | - | - | - | - | - | - | - | - |
| Portulacaceae / *Talinum* | 6 | 0.1 | 8 | 0.2 | 42 | 1.03 | 59 | 2.37 | 43 | 1.79 | 41 | 1.99 | 99 | 3.51 | 11 | 0.51 | 48 | 2.14 | 30 | 1.8 | 58 | 2.9 | 44 | 2.2 |
| Rhamnaceae / Type 1 | - | - | 3 | 0.1 | - | - | 4 | 0.16 | - | - | - | - | 7 | 0.25 | 22 | 1.02 | 16 | 0.71 | 5 | 0.3 | - | - | - | - |
| Rubiaceae / *Spermacoce* | 6 | 0.1 | 7 | 0.1 | 11 | 0.27 | 1 | 0.04 | 5 | 0.21 | 5 | 0.24 | 5 | 0.18 | 10 | 0.46 | 10 | 0.44 | - | - | - | - | - | - |
| Rubiaceae / *Posoqueria* | 1 | 0.02 | 2 | - | - | - | 35 | 1.4 | 9 | 0.37 | 3 | 0.15 | 12 | 0.42 | 10 | 0.46 | 10 | 0.44 | 20 | 1.2 | 22 | 1.1 | 5 | 0.25 |
| Rubiaceae*/ Psychotria* | 21 | 0.37 | 42 | 0.8 | 117 | 2.88 | 37 | 1.48 | 36 | 1.5 | 7 | 0.34 | 51 | 1.81 | 22 | 1.02 | 16 | 0.71 | 13 | 0.8 | 28 | 1.4 | 23 | 1.15 |
| Rutaceae / *Citrus* | 56 | 0.98 | 42 | 0.8 | 67 | 1.65 | 34 | 1.36 | 10 | 0.41 | 32 | 1.55 | 47 | 1.66 | 38 | 1.78 | 36 | 1.6 | 10 | 0.6 | 35 | 1.75 | 10 | 0.5 |
| Rutaceae / *Zanthoxylum* | - | - | - | - | - | - | - | - | - | - | - | - | 16 | 0.57 | - | - | - | - | 16 | 1 | - | - | - | - |
| Salicaceae / *Casearia* | 10 | 0.17 | 12 | 0.2 | 42 | 1.03 | 13 | 0.52 | 24 | 1 | 13 | 0.63 | - | - | 12 | 0.56 | 22 | 0.98 | - | - | 30 | 1.5 | 14 | 0.7 |
| Salicaceae / *Laetia* | 37 | 0.65 | 19 | 0.4 | - | - | 15 | 0.6 | 49 | 2.04 | 54 | 2.62 | 69 | 2.44 | - | - | 30 | 1.33 | - | - | 9 | 0.45 | 44 | 2.2 |
| Sapindaceae / *Cupania* | - | - | 7 | 0.1 | - | - | 10 | 0.4 | - | - | - | - | - | - | - | - | 10 | 0.44 | 15 | 0.9 | - | - | 10 | 0.5 |
| Sapindaceae*/ Paullinia* | 8 | 0.14 | 3 | 0.1 | 31 | 0.76 | 26 | 1.04 | 28 | 1.16 | 10 | 0.48 | 29 | 1.03 | 6 | 0.28 | - | - | 19 | 1.2 | 48 | 2.4 | 52 | 2.6 |
| Sapindaceae / *Serjania* | 4 | 0.07 | 39 | 0.7 | 11 | 0.27 | 18 | 0.72 | 48 | 2 | 7 | 0.34 | 29 | 1.03 | 24 | 1.11 | 37 | 1.65 | 19 | 1.2 | 22 | 1.1 | 20 | 1 |
| Solanaceae / *Capsicum* | 18 | 0.31 | 15 | 0.3 | 27 | 0.66 | - | - | - | - | 3 | 0.15 | - | - | - | - | 20 | 0.89 | - | - | 21 | 1.05 | 10 | 0.5 |
| Solanaceae / *Solanum* | 153 | 2.68 | 84 | 1.5 | 20 | 0.49 | - | - | 2 | 0.08 | 37 | 1.79 | 50 | 1.77 | 81 | 3.76 | 51 | 2.27 | 50 | 3 | - | - | 31 | 1.55 |
| Solanaceae / Type 1 | - | - | - | - | - | - | 13 | 0.52 | - | - | - | - | - | - | - | - | - | - | - | - | 6 | 0.3 | - | - |
| Solanaceae / Type 2 | - | - | - | - | - | - | 2 | 0.08 | - | - | - | - | - | - | - | - | - | - | - | - | - | - | - | - |
| Solanaceae / Type 3 | - | - | - | - | - | - | - | - | - | - | - | - | 2 | 0.07 | 11 | 0.51 | - | - | - | - | - | - | - | - |
| Urticaceae / *Cecropia* | 177 | 3.1 | 348 | 6.4 | 105 | 2.6 | 35 | 1.4 | 53 | 2.2 | 45 | 2.18 | 42 | 1.49 | 54 | 2.5 | 30 | 1.33 | - | - | - | - | 50 | 2.5 |
| TOTAL | 5716 | 100 | 5444 | 100 | 4055 | 100 | 2491 | 100 | 2406 | 100 | 2064 | 100 | 2822 | 100 | 2156 | 101 | 2247 | 100 | 1654 | 100 | 1996 | 100 | 1996 | 100 |
